# Supplementary material
Source: HighWire-hosted journal article supplement (https://jnis.bmj.com/content/16/2/171)
Supplement: inline-supplementary-material-1 [file inline-supplementary-material-1.pdf]

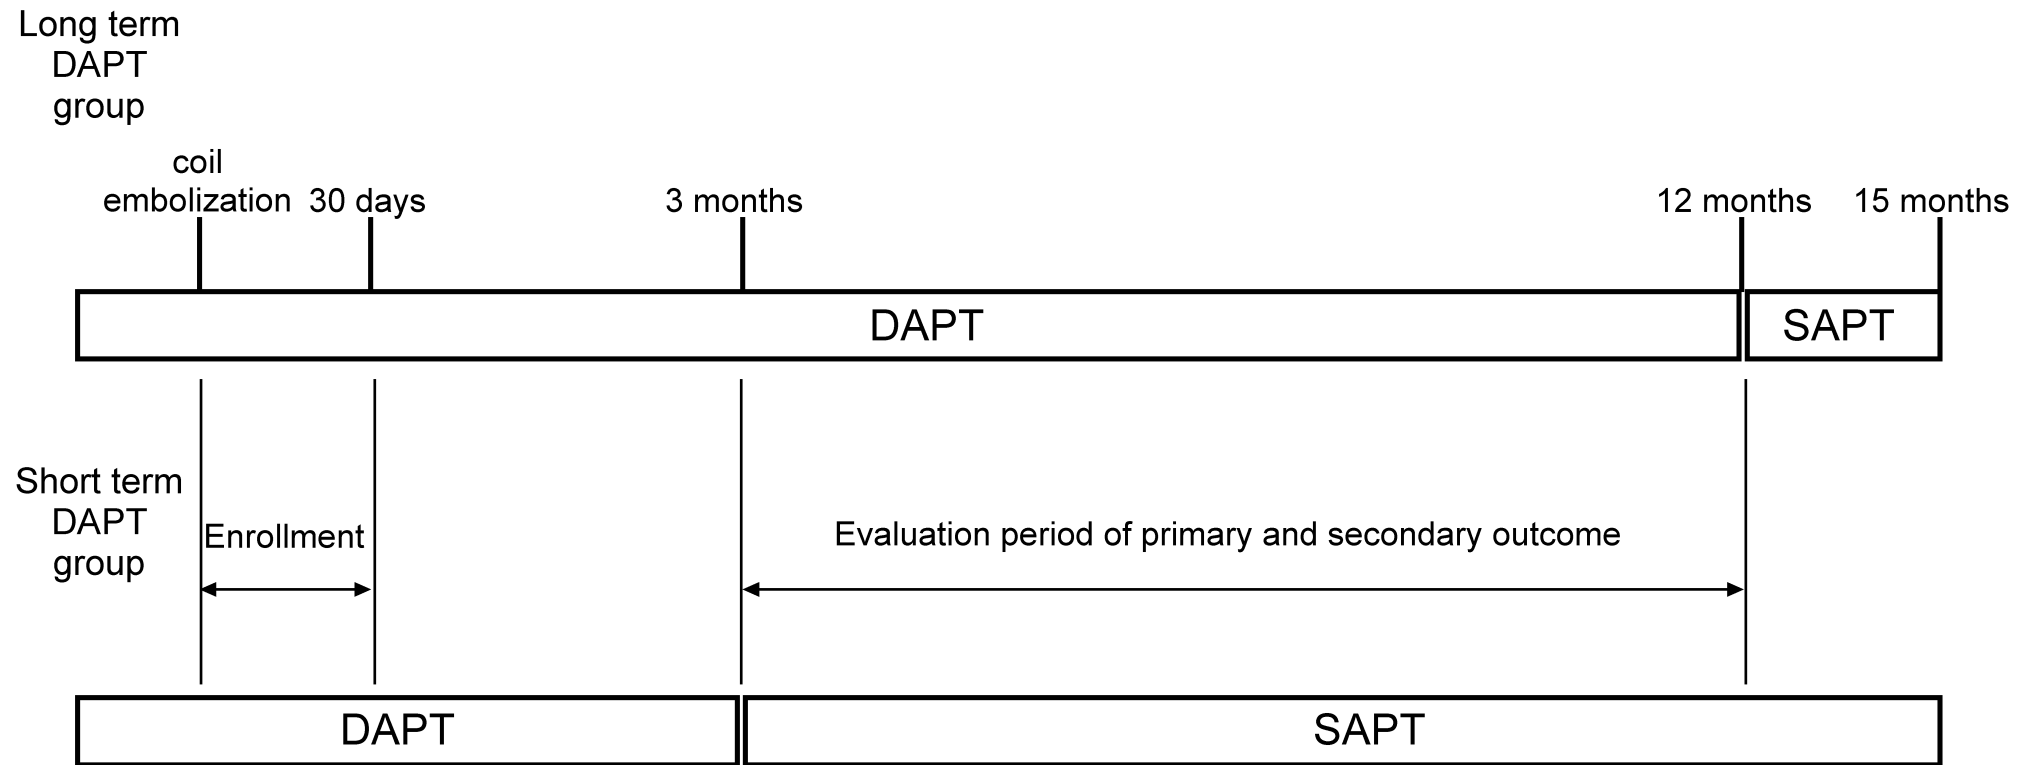

Supplementary Figure 1. Trial schedules for the long- and short-term dual antiplatelet therapy

Supplementary Table 1

Characteristics of RCT and non-RCT cohort

|                                                       | RCT cohort<br>(n=136) | Non-RCT cohort<br>(n=114) | p value |
|-------------------------------------------------------|-----------------------|---------------------------|---------|
| Background characteristics                            |                       |                           |         |
| Age: mean $\pm$ SD                                    | 59.0 $\pm$ 12.5       | 59.8 $\pm$ 13.4           | 0.658   |
| Man: n (%)                                            | 41 (30.1)             | 38 (33.3)                 | 0.687   |
| Previous SAH                                          | 9 (6.6)               | 14 (12.3)                 | 0.186   |
| Previous hemorrhagic stroke                           | 1 (0.7)               | 8 (7.0)                   | 0.021   |
| Previous ischemic stroke                              | 3 (2.2)               | 10 (8.8)                  | 0.041   |
| Risk Factors: n (%)                                   |                       |                           |         |
| Hypertension                                          | 60 (44.1)             | 63 (55.3)                 | 0.103   |
| Diabetes                                              | 8 (5.9)               | 8 (7.0)                   | 0.916   |
| Dyslipidemia                                          | 45 (33.1)             | 41 (36.0)                 | 0.731   |
| Smoking habit                                         | 25 (18.4)             | 15 (13.2)                 | 0.343   |
| Target aneurysm, maximum diameter (mm): mean $\pm$ SD | 7.02 $\pm$ 2.62       | 7.95 $\pm$ 4.10           | 0.030   |
| Radiographic outcome: n (%)                           |                       |                           | 0.257   |
| Complete occlusion                                    | 49 (36.0)             | 35 (30.7)                 |         |
| Neck remnant                                          | 49 (36.0)             | 36 (31.6)                 |         |
| Aneurysm filling                                      | 38 (27.9)             | 43 (37.7)                 |         |

Abbreviations: RCT, randomized control trial; SD, standard deviation; SAH, subarachnoid hemorrhage

Supplementary Table 2

Event rate of RCT and non-RCT cohort during 3 to 12 months after SACE

|                                           | RCT cohort | Non-RCT cohort | HR<br>(95% CI)       | p<br>value* |
|-------------------------------------------|------------|----------------|----------------------|-------------|
| Ischemic stroke                           | n=133      | n=111          |                      |             |
|                                           | 1 (1.1)    | 1 (1.2)        | 1.15<br>(0.05-29.13) | 0.92        |
| Death or any stroke                       | n=133      | n=111          |                      |             |
|                                           | 2 (2.1)    | 1 (1.2)        | 0.58<br>(0.03-6.02)  | 0.65        |
| Hemorrhagic event                         | n=133      | n=112          |                      |             |
|                                           | 2 (2.1)    | 1 (1.2)        | 1.14<br>(0.05-28.76) | 0.93        |
| Death, any stroke or<br>hemorrhagic event | n=133      | n=110          |                      |             |
|                                           | 3 (3.2)    | 1 (1.2)        | 0.58<br>(0.03-6.07)  | 0.65        |
| Retreatment, Stent<br>occlusion/stenosis  | n=133      | n=114          |                      |             |
|                                           | 4 (4.3)    | 5 (6.0)        | 1.38<br>(0.37-5.58)  | 0.63        |

In the Non-RCT cohort, event occurred in 4 cases within 3 months after SACE. The patients were excluded in each event according to their event types.

The reference group is RCT cohort.

\* Event-free survival was compared between the groups using the log-rank test, and the hazard ratios and 95% confidence intervals were calculated using proportional hazards analysis.

Abbreviations: RCT, randomized control trial; SACE, stent-assisted coil embolization; CI, confidence interval

## Supplementary Table 3

## Continued antiplatelet drug in reducing from DAPT to SAPT

| No. of Patients    | Long term DAPT (n=65) | Short term DAPT (n=68) | p value |
|--------------------|-----------------------|------------------------|---------|
| Aspirin: n (%)     | 42 (64.6)             | 39 (57.4)              | 0.273   |
| Clopidogrel: n (%) | 21 (32.3)             | 29 (42.6)              |         |

Abbreviations: DAPT, dual antiplatelet therapy; SAPT, single antiplatelet therapy

## Supplementary Table 4

Platelet aggregation study (Verify Now™) at registration and 6 and 12 months after SACE

|              | Long term DAPT |        |       |       | Short term DAPT |    |        |       |       |
|--------------|----------------|--------|-------|-------|-----------------|----|--------|-------|-------|
|              | N              | Median | Q1    | Q3    | Continuous drug | N  | Median | Q1    | Q3    |
| ARU          |                |        |       |       |                 |    |        |       |       |
| Registration | 63             | 425.0  | 403.0 | 501.0 | Any             | 70 | 429.0  | 395.0 | 485.0 |
| 6 months     | 54             | 432.0  | 394.0 | 493.0 | Any             | 55 | 507.0  | 437.0 | 616.0 |
|              |                |        |       |       | Aspirin         | 33 | 458.0  | 437.0 | 616.0 |
|              |                |        |       |       | Clopidogrel     | 21 | 615.0  | 519.0 | 638.0 |
| 12 months    | 50             | 412.5  | 397.0 | 485.0 | Any             | 51 | 510.0  | 428.0 | 616.0 |
|              |                |        |       |       | Aspirin         | 29 | 468.0  | 418.0 | 510.0 |
|              |                |        |       |       | Clopidogrel     | 22 | 615.0  | 519.0 | 638.0 |
| PRU          |                |        |       |       |                 |    |        |       |       |
| Registration | 63             | 157.0  | 83.0  | 207.0 | Any             | 70 | 162.0  | 114.0 | 214.0 |
| 6 months     | 54             | 165.5  | 119.0 | 203.0 | Any             | 54 | 220.0  | 171.0 | 260.0 |
|              |                |        |       |       | Aspirin         | 30 | 251.5  | 210.0 | 294.0 |
|              |                |        |       |       | Clopidogrel     | 23 | 174.0  | 104.0 | 219.0 |
| 12 months    | 50             | 169.5  | 123.0 | 212.0 | Any             | 53 | 210.0  | 176.0 | 259.0 |
|              |                |        |       |       | Aspirin         | 28 | 234.0  | 205.5 | 266.5 |
|              |                |        |       |       | Clopidogrel     | 25 | 176.0  | 127.0 | 211.0 |

Abbreviations: SACE, stent assisted coil embolization; DAPT, dual antiplatelet therapy; ARU, aspirin reaction units; PRU, P2Y12 reaction units
